# Supplementary material for: A top-down design for easy gram scale synthesis of melem nano rectangular prisms with improved surface area
Source: Royal Society of Chemistry journal article supplement (doi:10.1039/d1ra07440g), 2021-01-01
Supplement: d1ra07440g1.pdf [file d1ra07440g1.pdf]

## Supplemental Information

# A Top-Down Design for Easy Gram Scale Synthesis of Melem Nano Rectangular Prism with Improved Surface Area

Mahsa Nikookar,<sup>a</sup> Abdolreza Rezaeifard,<sup>a\*</sup> Maasoumeh Jafarpour,<sup>a\*</sup> Kirill V. Grzhegorzhevskii,<sup>b</sup> and Alexander A. Ostroushko<sup>b</sup>

<sup>a</sup>*Catalysis Research Laboratory, Department of Chemistry, Faculty of Science, University of Birjand, Birjand, 97175-414, Iran. E-mail: rrezaeifard@birjand.ac.ir, rrezaeifard@gmail.com, mjafarpour@birjand.ac.ir.*

<sup>b</sup>*Institute of Natural Sciences and Mathematics, Ural Federal University named after the B.N. Yeltsin, 620002, Ekaterinburg, Russia*

## Experimental

### Analysis methods

Fourier transform infrared spectroscopy (FT-IR) spectra were recorded using a Shimadzu 800 FT-IR spectrometer using a KBr disk. NMR spectra were recorded on a Bruker Avance 300 MHz NMR spectrometer. X-ray diffraction (XRD) studies were recorded on a Bruker D8-advance X-ray diffractometer with Cu K $\alpha$  ( $\lambda = 1.5406 \text{ \AA}$ ) radiation. Mass spectra were recorded on an Agilent Technology (HP) with a 5973 Network Mass Selective Detector. Thermogravimetric analyses (TGA) were performed on a TGA-50 (Shimadzu) apparatus in air atmosphere with a heating rate of 10 °C/min under a nitrogen atmosphere. Photoluminescence (PL) measurements were recorded on a RF-5301DCM SHIMADZU instrument. The UV-Vis diffuse reflectance (DRS) analyses were carried out using a Avaspec-2048-TEC (Avant's spectrophotometer) in the span of 300–800 nm, and using BaSO<sub>4</sub> as a standard reference. Field Emission Scanning Electron Microscope (SEM) was performed on Zeiss sigma 300 HV. N<sub>2</sub> adsorption-desorption isotherms were performed on a Belsorp-mini II (Bel Japan) under a vacuum at 80 °C. X-ray photoelectron spectroscopy (XPS) measurements were performed using electron spectrometer K-Alpha + (Thermo Fisher Scientific, USA) with monochromatic Al K $\alpha$  radiation (1486 eV). Elemental analysis was performed on an Eager 300 for EA1112 CHN Analyzer.

### Procedure for the synthesis of monomer melem from depolymerization of polymer g-C<sub>3</sub>N<sub>4</sub>

Polymer g-C<sub>3</sub>N<sub>4</sub> was synthesized according to a previously reported protocol [1]. Briefly, melamine (3.0 g) was calcined at 550 °C for 3 h with a heating rate of 5 °C/min under air atmosphere. The obtained yellow powder was completely grounded, then 0.2 g of the powder was added to 20 mL of concentrated H<sub>2</sub>SO<sub>4</sub> (95-98%). The mixture was heated at 80 °C for 1 h. Then, the mixture was allowed to cool to room temperature followed by adding to a 200 mL ice-deionized water mixture. The resulting white sediment was filtered by centrifugation, washed with deionized water and ethanol several times (5 × 40 mL) to neutralize the mixture, and the white powder was dried under air (yield>95%). For further purification, it can be dissolved in dilute acid and precipitated by neutralization,<sup>2</sup> or dissolved in DMSO and precipitated by diethyl ether (EA%; C:32.71, H:2.93, N:63.0, S:0.41%). A 5 fold semi-scaled up procedure using 1.0 g g-C<sub>3</sub>N<sub>4</sub> polymer led to the isolation of the related pure monomer melem in 95% yield within 1 h.

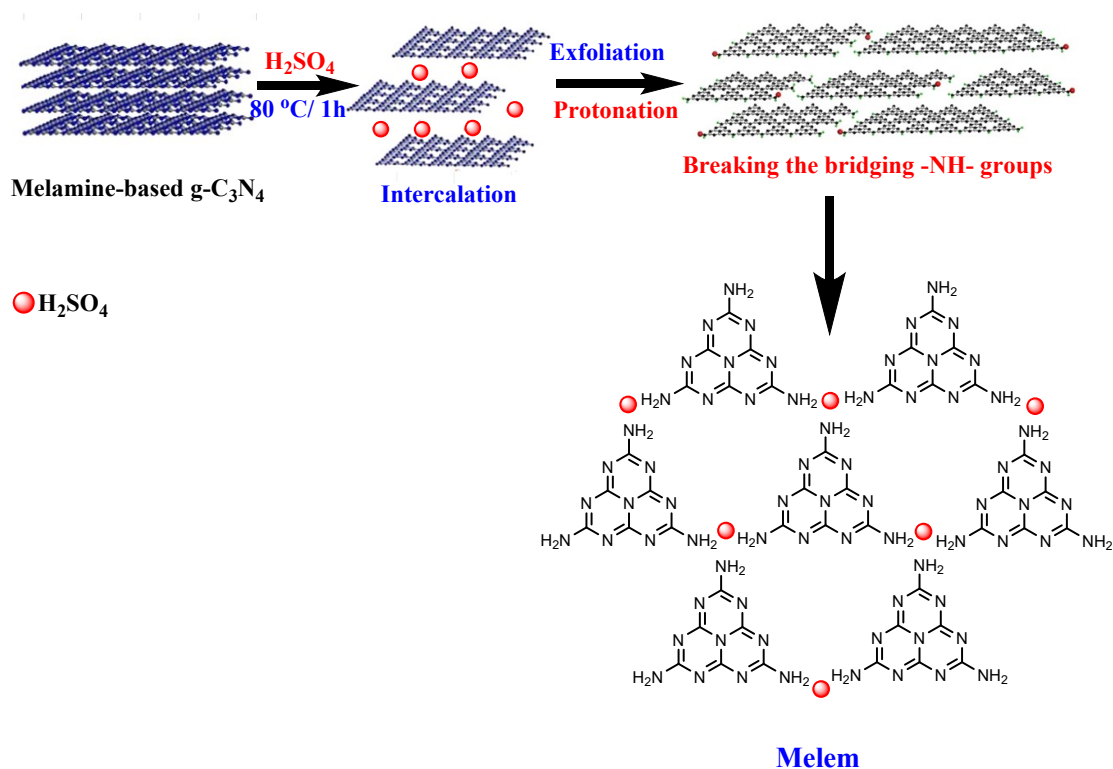

**Scheme S1.** The suggested mechanism for the acidic depolymerization of melamine-based g-C<sub>3</sub>N<sub>4</sub> to monomer melem.

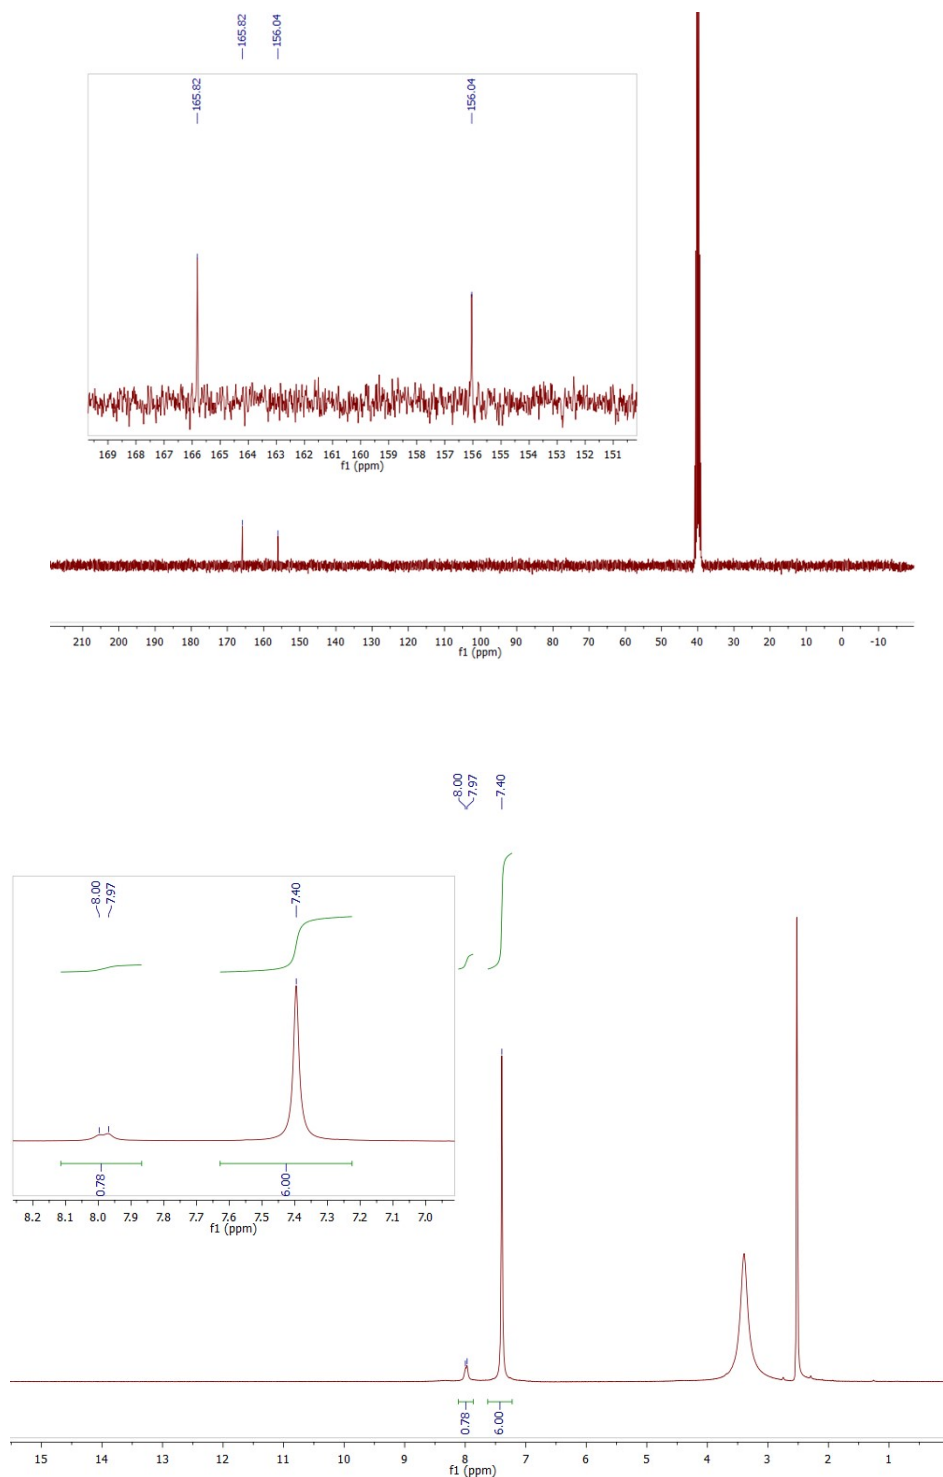

**Figure S1.**  $^{13}\text{C}$  NMR (top) and  $^1\text{H}$  NMR spectrum (down) of the as-synthesized melem in DMSO before further purification. The sample is only dissolved in DMSO with very limited solubility and for  $^{13}\text{C}$  NMR it has to stay 3-4 days in DMSO- $\text{d}^6$ .

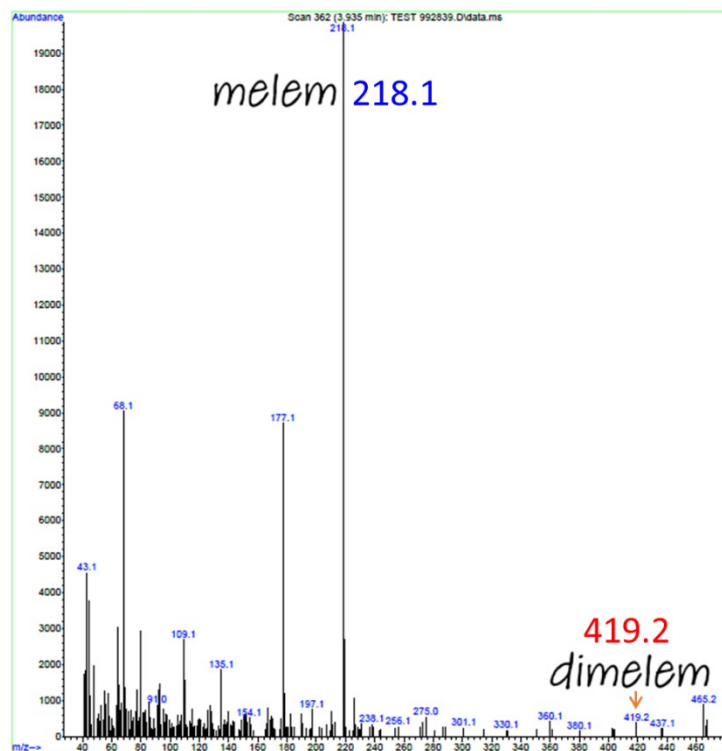

Figure S2. MS spectra of the as-synthesized melem before further purification

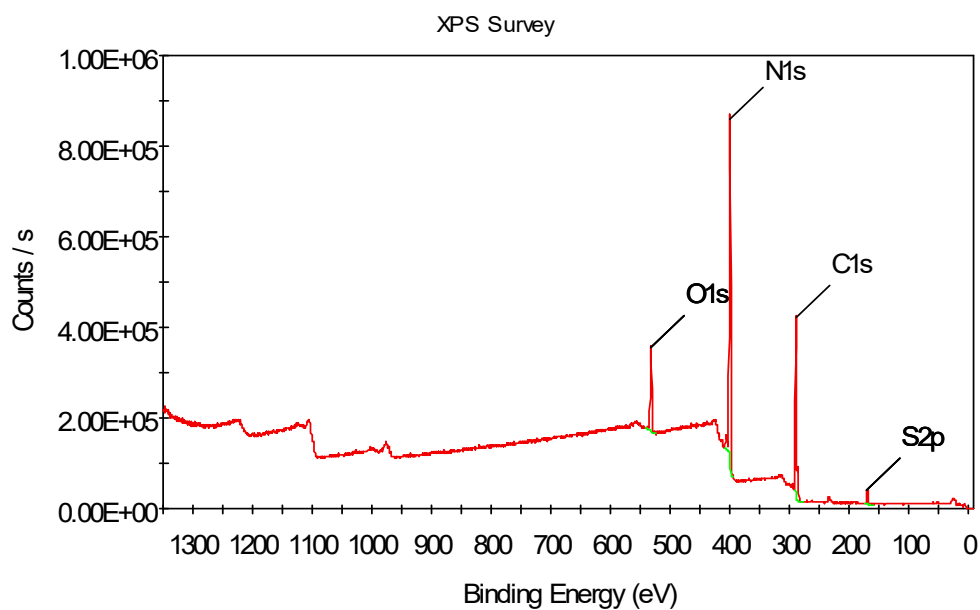

Figure S3. XPS survey of the as-synthesized melem before further purification

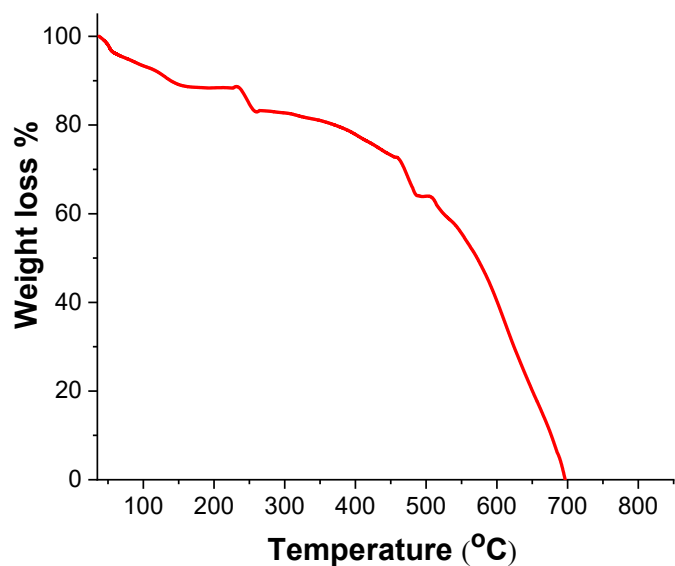

Figure S4. TGA curve of the as-synthesized melem under a nitrogen atmosphere before further purification

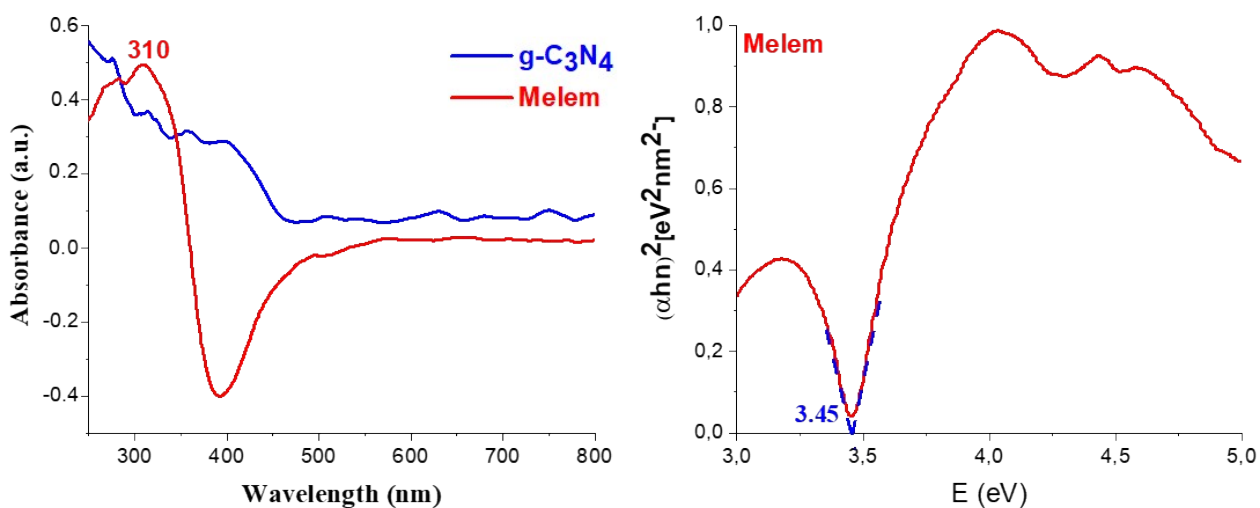

Figure S5. DRS UV-Vis spectra of the as-synthesized  $g\text{-C}_3\text{N}_4$  and melem (left) and tauc's plot of melem (right). The recorded negative absorption of melem below 400 nm comes from the stronger adsorption of the  $\text{BaSiO}_4$  reference.<sup>3</sup>

## Reference:

1. Liu, S.; Wang, S.; Jiang, Y.; Zhao, Z.; Jiang, G.; Sun, Z. Synthesis of Fe<sub>2</sub>O<sub>3</sub> loaded porous g-C<sub>3</sub>N<sub>4</sub> photocatalyst for photocatalytic reduction of dinitrogen to ammonia. *Chem. Eng. J.* 2019, **373**, 572-579.
2. A. I. Finkelshtein and N. V. Spiridonova, *Russ. Chem. Rev.*, 1964, **33**, 400–405.
3. Liu, N.; Li, T.; Zhao, Z.; Liu, J.; Luo, X.; Yuan, X.; Luo, K.; He, J.; Yu, D.; Zhao Y.; *ACS Omega* 2020, **5**, 12557–12567.
